# Supplementary material for: Understanding Eating Behavior during the Transition from Adolescence to Young Adulthood: A Literature Review and Perspective on Future Research Directions
Source: PubMed Central journal article supplement (PMC6024552; doi:10.3390/nu10060667), 2018-05-24
Supplement: nutrients-10-00667-s001.pdf [file nutrients-10-00667-s001.pdf]

**Supplemental file 1: Factors associated with (changes in) eating behavior during the transition from adolescence to young adulthood**

Note: This appendix lists all the factors associated with (changes in) eating behavior as identified in our literature search. The factors are sorted using the DEDIPAC DONE framework (9) structure. In the DONE framework, four main socio-ecological levels of influence are distinguished (individual, interpersonal, environment, policy), each further subdivided into stem-categories. Within each stem-category, several **more** specific leaf-categories of determinants are distinguished. The DONE framework provides an indication of the modifiability of each of these categories (based on expert ratings, see (9) for more information), which is also provided here. This rating indicates to what extent experts in the field consider it theoretically possible to modify the average determinant in this stem-category (so note that the ratings are not based on the exact same factors identified in this scoping review, but on similar determinants belonging to the same specific leaf-category within the framework). Possible modifiability scores range from 1.00 (lowest modifiability) to 3.00 (highest modifiability).

| #  | Name of factor                                   | Source article                                              | DONE framework:<br>Socio-ecological<br>level of influence<br>and stem-category | DONE framework:<br>Specific leaf-category  | DONE framework:<br>Modifiability of<br>specific category |      |
|----|--------------------------------------------------|-------------------------------------------------------------|--------------------------------------------------------------------------------|--------------------------------------------|----------------------------------------------------------|------|
| 1  | lactose intolerance                              | Larson, 2009                                                | <b>Individual;</b><br>Biological                                               | Food-Related Physiology                    | 1.53                                                     |      |
| 2  | metabolism                                       | Deliens, 2014                                               |                                                                                | Anthropometrics                            | 1.80                                                     |      |
| 3  | BMI                                              | Lipsky, 2015                                                |                                                                                | Sensory Perception                         | 1.74                                                     |      |
| 4  | weight gain                                      | Wengreen, 2009                                              |                                                                                | Physical Health                            | 1.60                                                     |      |
| 5  | taste preferences                                | Deliens, 2014; Larson, 2008a;<br>Larson, 2009               |                                                                                | <b>Individual;</b><br>Demographic          | Cultural Characteristics                                 | 1.46 |
| 6  | physical and mental health status                | Kwok, 2016                                                  |                                                                                |                                            | Situational Demographics                                 | 1.67 |
| 7  | vitality                                         | Deliens, 2014                                               |                                                                                |                                            | Personal Socio-Economic<br>Status                        | 1.73 |
| 8  | ethnicity                                        | Lipsky, 2015                                                |                                                                                |                                            | Mood And Emotions                                        | 1.70 |
| 9  | gender                                           | Brunstrom, 2008; Lipsky, 2015                               | <b>Individual;</b><br>Psychological                                            |                                            | Self-Regulation                                          | 1.80 |
| 10 | living off campus; cooking and shopping for self | LaCaille, 2011                                              |                                                                                | Health Cognitions                          | 2.09                                                     |      |
| 11 | residency (living arrangement)                   | Deliens, 2014                                               |                                                                                | Food Knowledge, Skills<br>And Abilities    | 2.27                                                     |      |
| 12 | income                                           | Kwok, 2016                                                  |                                                                                |                                            |                                                          |      |
| 13 | boredom                                          | Nelson, 2009                                                |                                                                                | Food Beliefs                               | 2.16                                                     |      |
| 14 | mood                                             | Deliens, 2014                                               |                                                                                |                                            |                                                          |      |
| 15 | self-control                                     | LaCaille, 2011; Tomasone, 2015                              |                                                                                |                                            |                                                          |      |
| 16 | self-discipline                                  | Deliens, 2014                                               |                                                                                |                                            |                                                          |      |
| 17 | time management skills                           | Cluskey, 2009; Nelson, 2009                                 |                                                                                |                                            |                                                          |      |
| 18 | healthy eating intentions                        | Tomasone, 2015                                              |                                                                                |                                            |                                                          |      |
| 19 | intrinsic motivation                             | Cluskey, 2009                                               |                                                                                |                                            |                                                          |      |
| 20 | motivation                                       | LaCaille, 2011                                              |                                                                                |                                            |                                                          |      |
| 21 | autonomy in food choices                         | Kwok, 2016                                                  |                                                                                | Food Habits                                | 1.91                                                     |      |
| 22 | dietary knowledge                                | Deliens, 2014                                               |                                                                                |                                            |                                                          |      |
| 23 | food preparation involvement                     | Cluskey, 2009; Larson, 2008a                                |                                                                                |                                            |                                                          |      |
| 24 | self-efficacy for healthy eating                 | Larson, 2008a; Larson, 2008b;<br>Larson, 2009; Strong, 2008 |                                                                                |                                            |                                                          |      |
| 25 | beliefs, norms and values regarding food         | Deliens, 2014                                               |                                                                                |                                            |                                                          |      |
| 26 | perceived barriers to healthy eating             | Larson, 2008a; Larson, 2009                                 |                                                                                |                                            |                                                          |      |
| 27 | perceived benefits of healthy eating             | Larson, 2008a; Strong, 2008                                 |                                                                                |                                            |                                                          |      |
| 28 | perceived financial barriers to healthy eating   | Strong, 2008                                                |                                                                                |                                            |                                                          |      |
| 29 | perceived taste barriers to healthy eating       | Larson, 2008b                                               |                                                                                |                                            |                                                          |      |
| 30 | perceived time barriers to healthy eating        | Larson, 2008b; Strong, 2008                                 |                                                                                |                                            |                                                          |      |
| 31 | breakfast frequency                              | Larson, 2008a; Larson, 2009;<br>Lipsky, 2015                |                                                                                | Weight-Control Cognitions<br>And Behaviors | 1.94                                                     |      |
| 32 | dinner frequency                                 | Larson, 2008a                                               |                                                                                |                                            |                                                          |      |
| 33 | eating in front of the television                | Lipsky, 2015                                                |                                                                                |                                            |                                                          |      |
| 34 | eating out for variety                           | Nelson, 2009                                                |                                                                                |                                            |                                                          |      |
| 35 | eating routines                                  | Cluskey, 2009                                               |                                                                                |                                            |                                                          |      |
| 36 | energy drink frequency                           | Poulos, 2015                                                |                                                                                |                                            |                                                          |      |
| 37 | fast food frequency                              | Larson, 2008a; Larson, 2009                                 |                                                                                |                                            |                                                          |      |
| 38 | frequency of eating at university canteens       | Guagliardo, 2011                                            |                                                                                |                                            |                                                          |      |
| 39 | lunch frequency                                  | Larson, 2008b                                               |                                                                                |                                            |                                                          |      |
| 40 | past eating habits                               | Deliens, 2014                                               |                                                                                |                                            |                                                          |      |
| 41 | snack frequency                                  | Larson, 2008a; Larson, 2008b;<br>Larson, 2009               |                                                                                |                                            |                                                          |      |
| 42 | soft-drink frequency                             | Larson, 2009                                                |                                                                                |                                            |                                                          |      |
| 43 | willingness-to-pay                               | Nelson, 2009                                                |                                                                                |                                            |                                                          |      |
| 44 | body image                                       | Deliens, 2014                                               |                                                                                |                                            |                                                          |      |
| 45 | desire to gain weight                            | LaCaille, 2011                                              |                                                                                |                                            |                                                          |      |
| 46 | dietary restraint                                | Brunstrom, 2008                                             |                                                                                |                                            |                                                          |      |
| 47 | diETING                                          | Brunstrom, 2008                                             |                                                                                |                                            |                                                          |      |
| 48 | health concerns                                  | Kwok, 2016; Larson, 2008a;<br>Larson, 2008b                 |                                                                                |                                            |                                                          |      |
| 49 | healthy weight control behaviors                 | Larson, 2008a; Larson, 2009;<br>Strong, 2008                |                                                                                |                                            |                                                          |      |

|     |                                                    |                                                                 |                                   |                                          |                                  |      |
|-----|----------------------------------------------------|-----------------------------------------------------------------|-----------------------------------|------------------------------------------|----------------------------------|------|
| 50  | self-concept                                       | Deliens, 2014                                                   |                                   |                                          |                                  |      |
| 51  | weight concerns                                    | Larson, 2008a; Larson, 2009                                     |                                   |                                          |                                  |      |
| 52  | hunger                                             | Brunstrom, 2008; Nelson, 2009                                   | <b>Individual;</b><br>Situational | Hunger                                   | 1.83                             |      |
| 53  | alcohol consumption                                | LaCaille, 2011; Lloyd-Richardson, 2008; Nelson, 2009            |                                   | Related Health Behaviors                 |                                  | 2.18 |
| 54  | anticipating alcohol consumption                   | Nelson, 2009                                                    |                                   |                                          |                                  |      |
| 55  | physical activity                                  | Deliens, 2014; Lipsky, 2015                                     |                                   |                                          |                                  |      |
| 56  | television viewing                                 | Barr-Anderson, 2009; Larson, 2008a; Larson, 2008b; Larson, 2009 |                                   |                                          |                                  |      |
| 57  | accessibility to a full kitchen                    | Nelson, 2009                                                    |                                   |                                          |                                  |      |
| 58  | availability and accessibility of cooking supplies | Deliens, 2014; LaCaille, 2011                                   |                                   |                                          |                                  |      |
| 59  | convenience of meal preparation                    | Deliens, 2014                                                   |                                   |                                          |                                  |      |
| 60  | daily rhythm/structure                             | Deliens, 2014                                                   |                                   |                                          |                                  |      |
| 61  | distance between home and school                   | Kwok, 2016                                                      |                                   |                                          |                                  |      |
| 62  | exam time                                          | Deliens, 2014                                                   |                                   |                                          |                                  |      |
| 63  | relative priority of meal preparation              | Deliens, 2014                                                   |                                   |                                          |                                  |      |
| 64  | stress                                             | Deliens, 2014; Kwok, 2016; Nelson, 2009                         |                                   |                                          |                                  |      |
| 65  | studying                                           | Nelson, 2009                                                    |                                   |                                          |                                  |      |
| 66  | time constraints                                   | Deliens, 2014; LaCaille, 2011; Kwok, 2016; Nelson, 2009         |                                   | <b>Interpersonal;</b><br>Social          | Situational And Time Constraints | 2.02 |
| 67  | university lifestyle                               | Deliens, 2014                                                   |                                   |                                          |                                  |      |
| 68  | food habits of the family                          | Kwok, 2016                                                      |                                   |                                          |                                  |      |
| 69  | family food education                              | Kwok, 2016                                                      |                                   |                                          |                                  |      |
| 70  | family meal frequency                              | Larson, 2007; Larson, 2008a; Larson, 2009; Lipsky, 2015         |                                   |                                          |                                  |      |
| 71  | family affluence                                   | Lipsky, 2015; Kwok, 2016                                        |                                   |                                          |                                  |      |
| 72  | food insecurity                                    | Larson, 2009                                                    |                                   |                                          |                                  |      |
| 73  | being member of a student society                  | Deliens, 2014                                                   |                                   |                                          |                                  |      |
| 74  | influence of friends                               | Kwok, 2016; Strong, 2008                                        |                                   |                                          |                                  |      |
| 75  | peer pressure                                      | Cluskey, 2009; Deliens, 2014                                    |                                   |                                          |                                  |      |
| 76  | socializing                                        | Nelson, 2009                                                    |                                   |                                          |                                  |      |
| 77  | social norms                                       | Kwok, 2016                                                      |                                   |                                          |                                  |      |
| 78  | parental support for healthy eating                | Larson, 2008a                                                   |                                   |                                          |                                  |      |
| 79  | peer support for healthy eating                    | Larson, 2008a; Larson, 2008b; Larson, 2009                      |                                   |                                          |                                  |      |
| 80  | receiving food from family                         | Nelson, 2009                                                    |                                   |                                          |                                  |      |
| 81  | social support                                     | Cluskey, 2009; Deliens, 2014; LaCaille, 2011; Strong, 2008      |                                   |                                          |                                  |      |
| 82  | parental control                                   | Deliens, 2014                                                   |                                   |                                          |                                  |      |
| 83  | parenting style                                    | Deliens, 2014                                                   |                                   |                                          |                                  |      |
| 84  | culture                                            | Kwok, 2016                                                      | <b>Interpersonal;</b><br>Cultural | Cultural Cognitions                      | 1.80                             |      |
| 85  | socio-cultural norms and values                    | Deliens, 2014                                                   |                                   |                                          |                                  |      |
| 86  | product taste                                      | Kwok, 2016                                                      | <b>Environment;</b><br>Product    | Intrinsic Product Attributes             | 2.12                             |      |
| 87  | appeal of food products                            | Deliens, 2014                                                   |                                   |                                          |                                  |      |
| 88  | price of food                                      | Cluskey, 2009; Deliens, 2014; Kwok, 2016                        |                                   |                                          |                                  |      |
| 89  | price of healthy foods                             | LaCaille, 2011                                                  |                                   |                                          |                                  |      |
| 90  | product convenience                                | Kwok, 2016                                                      | <b>Environment;</b><br>Micro      | Home Food Availability And Accessibility | 2.20                             |      |
| 91  | home unhealthy food availability                   | Larson, 2008a; Larson, 2008b                                    |                                   |                                          |                                  |      |
| 92  | campus food environment                            | Cluskey, 2009; LaCaille, 2011                                   |                                   |                                          |                                  |      |
| 93  | characteristics of the meal plans                  | LaCaille, 2011                                                  |                                   |                                          |                                  |      |
| 94  | eating in all-you-can-eat cafeteria                | LaCaille, 2011                                                  |                                   |                                          |                                  |      |
| 95  | accessibility of food                              | Strong, 2008                                                    |                                   |                                          |                                  |      |
| 96  | availability and accessibility of foods            | Deliens, 2014                                                   |                                   |                                          |                                  |      |
| 97  | availability of food on campus                     | Nelson, 2009                                                    |                                   |                                          |                                  |      |
| 98  | lack of food outlet variety                        | Nelson, 2009                                                    |                                   |                                          |                                  |      |
| 99  | lack of healthy options on campus                  | LaCaille, 2011                                                  |                                   |                                          |                                  |      |
| 100 | mealtime milk availability                         | Larson, 2009                                                    |                                   |                                          |                                  |      |
| 101 | marketing strategies (cheap deals)                 | Nelson, 2009                                                    | <b>Environment;</b> Meso & Macro  | Exposure To Food Promotion               | 2.21                             |      |
| 102 | media and advertising                              | Deliens, 2014; Kwok, 2016                                       |                                   |                                          |                                  |      |
| 103 | state of the local economy                         | Kwok, 2016                                                      | <b>Policy;</b> Government         | Market prices                            | 1.89                             |      |
| 104 | food-related government policy                     | Kwok, 2016                                                      |                                   |                                          |                                  |      |
| 105 | market regulations                                 | Deliens, 2014                                                   |                                   |                                          |                                  |      |
